# Supplementary material for: Diagnostic and Prognostic Performance of Metabolic Signatures in Pancreatic Ductal Adenocarcinoma: The Clinical Application of Quantitative NextGen Mass Spectrometry
Source: MDPI journal article supplement (doi:10.3390/metabo14030148), 2024-02-29
Supplement: s1 [file s1]

**Supplemental Table S3** – The *AbsoluteIDQ® p180* kit by Biocrates AG Life Sciences with all of the analytes and their standard nomenclature.

| Amino acids (21) |            |     |               |
|------------------|------------|-----|---------------|
| Ala              | Alanine    | Lys | Lysine        |
| Arg              | Arginine   | Met | Methionine    |
| Asn              | Asparagine | Orn | Ornithine     |
| Asp              | Aspartate  | Phe | Phenylalanine |
| Cit              | Citrulline | Pro | Proline       |
| Glu              | Glutamate  | Ser | Serine        |
| Gln              | Glutamine  | Thr | Threonine     |
| Gly              | Glycine    | Trp | Tryptophan    |
| His              | Histidine  | Tyr | Tyrosine      |
| Ile              | Isoleucine | Val | Valine        |
| Leu              | Leucine    |     |               |

| Biogenic amines (21) |                                |                        |                            |
|----------------------|--------------------------------|------------------------|----------------------------|
| Ac-Orn               | Acetylornithine                | Met-SO                 | Methionine sulfoxide       |
| alpha-AAA            | alpha-Aminoadipic acid         | Nitro-Tyr <sup>1</sup> | Nitrotyrosine              |
| ADMA                 | Asymmetric dimethylarginine    | PEA                    | Phenylethylamine           |
| Carnosine            | Carnosine                      | Putrescine             | Putrescine                 |
| Creatinine           | Creatinine                     | Sarcosine              | Sarcosine                  |
| DOPA                 | Dihydroxyphenylalanine         | Serotonin              | Serotonin                  |
| Dopamine             | Dopamine                       | Spermidine             | Spermidine                 |
| Histamine            | Histamine                      | Spermine               | Spermine                   |
| c4-OH-Pro            | <i>cis</i> -4-Hydroxyproline   | SDMA                   | Symmetric dimethylarginine |
| t4-OH-Pro            | <i>trans</i> -4-Hydroxyproline | Taurine                | Taurine                    |
| Kynurenine           | Kynurenine                     |                        |                            |

| Acylcarnitines (40) |                                                 |                    |                                                       |
|---------------------|-------------------------------------------------|--------------------|-------------------------------------------------------|
| C0                  | Carnitine                                       | C5-DC<br>(C6-OH)   | Glutaryl carnitine<br>(Hydroxyhexanoyl carnitine)     |
| C2                  | Acetyl carnitine                                | C5-M-DC            | Methylglutaryl carnitine                              |
| C3                  | Propionyl carnitine                             | C5-OH<br>(C3-DC-M) | Hydroxyvaleryl carnitine<br>(Methylmalonyl carnitine) |
| C3-OH               | Hydroxypropionyl carnitine                      | C5:1               | Tiglyl carnitine                                      |
| C3:1                | Propenoyl carnitine                             | C5:1-DC            | Glutaconyl carnitine                                  |
| C4                  | Butyryl carnitine                               | C6<br>(C4:1-DC)    | Hexanoyl carnitine<br>(Fumaryl carnitine)             |
| C4-OH<br>(C3-DC)    | Hydroxybutyryl carnitine<br>(Malonyl carnitine) | C6:1               | Hexenoyl carnitine                                    |
| C4:1                | Butenyl carnitine                               | C7-DC              | Pimeloyl carnitine                                    |
| C5                  | Valeryl carnitine                               | C8                 | Octanoyl carnitine                                    |
| C9                  | Nonayl carnitine                                | C14:2-OH           | Hydroxytetradecadienyl carnitine                      |
| C10                 | Decanoyl carnitine                              | C16                | Hexadecanoyl carnitine                                |
| C10:1               | Decenoyl carnitine                              | C16-OH             | Hydroxyhexadecanoyl carnitine                         |
| C10:2               | Decadienyl carnitine                            | C16:1              | Hexadecenoyl carnitine                                |
| C12                 | Dodecanoyl carnitine                            | C16:1-OH           | Hydroxyhexadecenoyl carnitine                         |
| C12-DC              | Dodecanedioyl carnitine                         | C16:2              | Hexadecadienyl carnitine                              |
| C12:1               | Dodecenoyl carnitine                            | C16:2-OH           | Hydroxyhexadecadienyl carnitine                       |
| C14                 | Tetradecanoyl carnitine                         | C18                | Octadecanoyl carnitine                                |
| C14:1               | Tetradecenoyl carnitine                         | C18:1              | Octadecenoyl carnitine                                |
| C14:1-OH            | Hydroxytetradecenoyl carnitine                  | C18:1-OH           | Hydroxyoctadecenoyl carnitine                         |
| C14:2               | Tetradecadienyl carnitine                       | C18:2              | Octadecadienyl carnitine                              |

| Glycerophospholipids (90) |                          |             |             |
|---------------------------|--------------------------|-------------|-------------|
| lysoPC a C14:0            | PC aa C34:1              | PC aa C42:0 | PC ae C38:2 |
| lysoPC a C16:0            | PC aa C34:2              | PC aa C42:1 | PC ae C38:3 |
| lysoPC a C16:1            | PC aa C34:3              | PC aa C42:2 | PC ae C38:4 |
| lysoPC a C17:0            | PC aa C34:4              | PC aa C42:4 | PC ae C38:5 |
| lysoPC a C18:0            | PC aa C36:0              | PC aa C42:5 | PC ae C38:6 |
| lysoPC a C18:1            | PC aa C36:1              | PC aa C42:6 | PC ae C40:1 |
| lysoPC a C18:2            | PC aa C36:2              | PC ae C30:0 | PC ae C40:2 |
| lysoPC a C20:3            | PC aa C36:3              | PC ae C30:1 | PC ae C40:3 |
| lysoPC a C20:4            | PC aa C36:4              | PC ae C30:2 | PC ae C40:4 |
| lysoPC a C24:0            | PC aa C36:5              | PC ae C32:1 | PC ae C40:5 |
| lysoPC a C26:0            | PC aa C36:6              | PC ae C32:2 | PC ae C40:6 |
| lysoPC a C26:1            | PC aa C38:0              | PC ae C34:0 | PC ae C42:0 |
| lysoPC a C28:0            | PC aa C38:1 <sup>2</sup> | PC ae C34:1 | PC ae C42:1 |
| lysoPC a C28:1            | PC aa C38:3              | PC ae C34:2 | PC ae C42:2 |
| PC aa C24:0               | PC aa C38:4              | PC ae C34:3 | PC ae C42:3 |
| PC aa C26:0               | PC aa C38:5              | PC ae C36:0 | PC ae C42:4 |
| PC aa C28:1               | PC aa C38:6              | PC ae C36:1 | PC ae C42:5 |
| PC aa C30:0               | PC aa C40:1              | PC ae C36:2 | PC ae C44:3 |
| PC aa C30:2 <sup>2</sup>  | PC aa C40:2              | PC ae C36:3 | PC ae C44:4 |
| PC aa C32:0               | PC aa C40:3              | PC ae C36:4 | PC ae C44:5 |
| PC aa C32:1               | PC aa C40:4              | PC ae C36:5 | PC ae C44:6 |
| PC aa C32:2               | PC aa C40:5              | PC ae C38:0 |             |
| PC aa C32:3               | PC aa C40:6              | PC ae C38:1 |             |

| Sphingomyelins (15) |               |                       |               |
|---------------------|---------------|-----------------------|---------------|
| SM (OH) C14:1       | SM C18:0      | SM (OH) C22:2         | SM (OH) C24:1 |
| SM C16:0            | SM C18:1      | SM C22:3 <sup>2</sup> | SM C26:0      |
| SM C16:1            | SM C20:2      | SM C24:0              | SM C26:1      |
| SM (OH) C16:1       | SM (OH) C22:1 | SM C24:1              |               |

| Monosaccharides (1) |                             |  |  |
|---------------------|-----------------------------|--|--|
| H1                  | Hexoses (including glucose) |  |  |
