# Supplementary material for: Diagnostic and Prognostic Performance of Metabolic Signatures in Pancreatic Ductal Adenocarcinoma: The Clinical Application of Quantitative NextGen Mass Spectrometry
Source: MDPI journal article supplement (doi:10.3390/metabo14030148), 2024-02-29
Supplement: s1 [file s1]

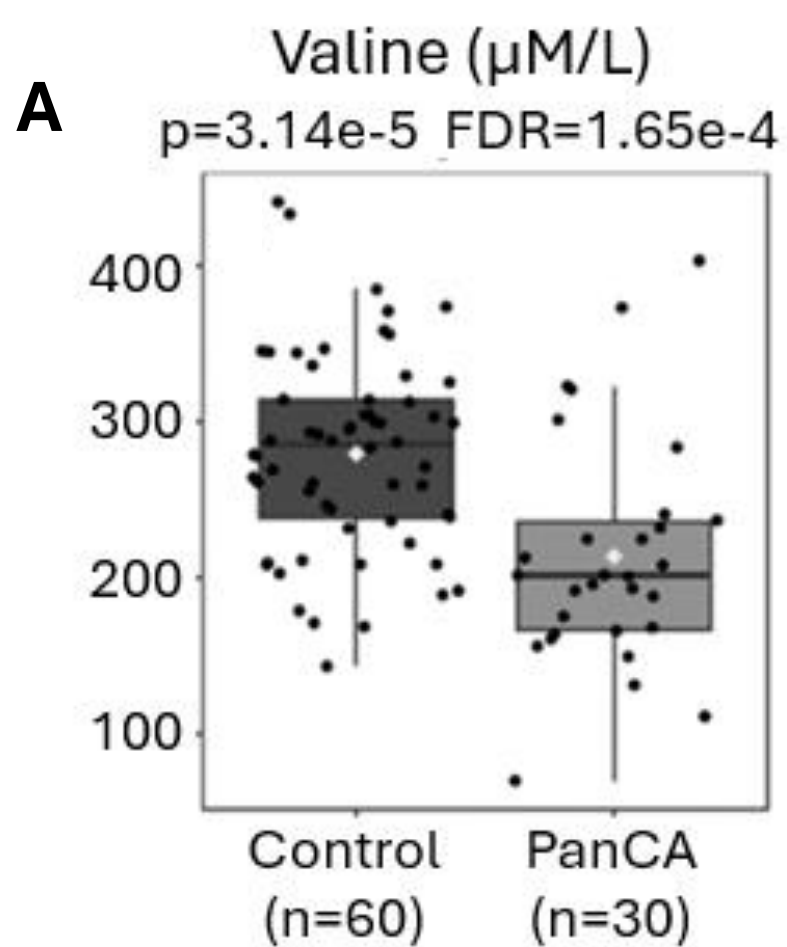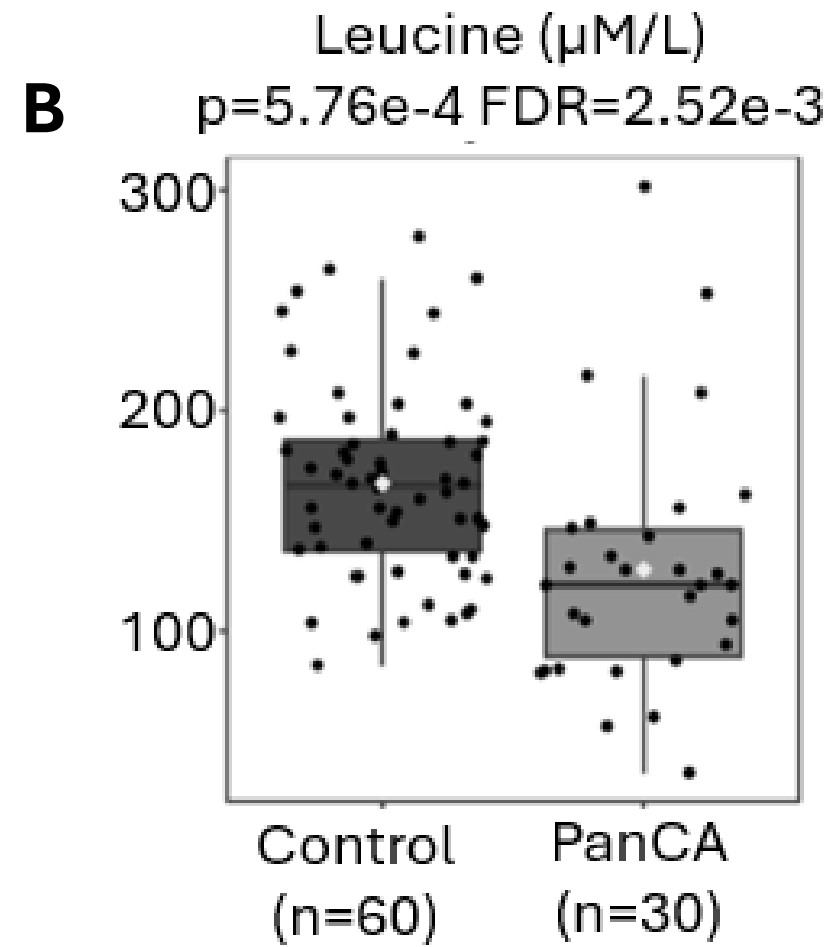

**Supplemental Figure S1 (A and B)** – A comparison of plasma BCAA (Valine (A) and Leucine (B) concentrations from pancreatic cancer patients (PanCA) and normal healthy controls (Controls)

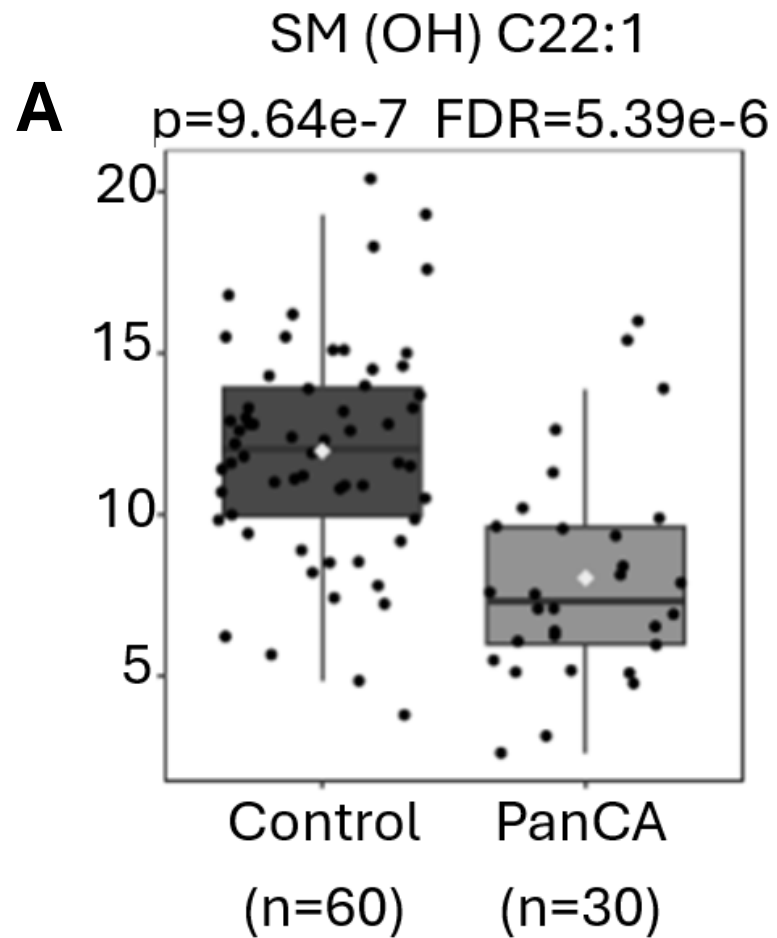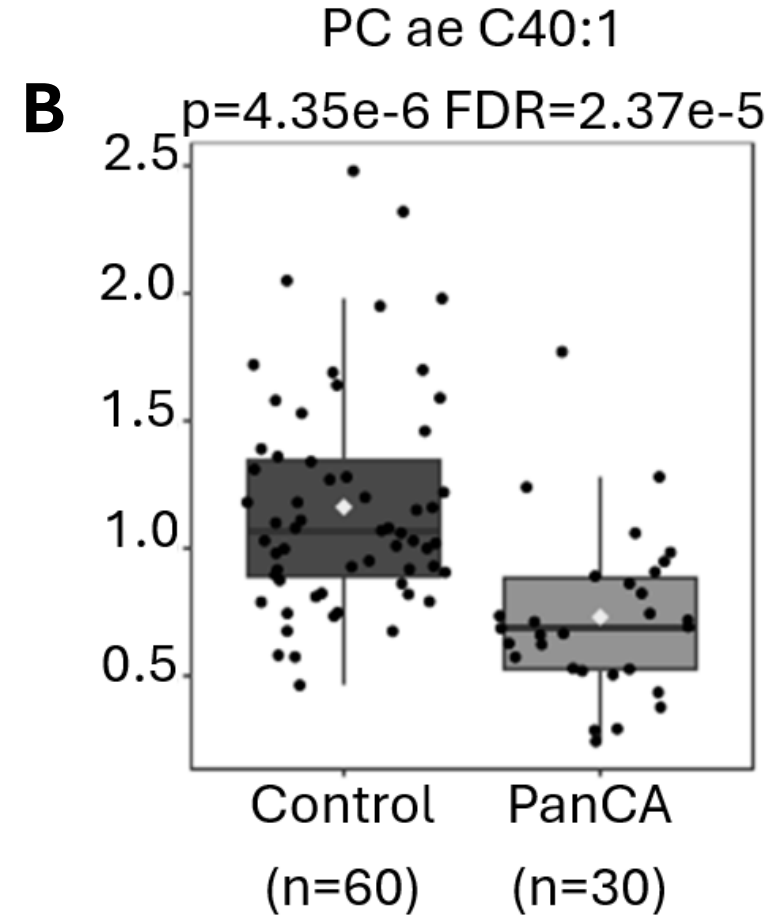

**Supplemental Figure S2 (A and B)** – A comparison of plasma sphingomyelin (SM (OH) C22:1) (A) and Phosphatidyl choline (PC ae C40:1) (B) concentrations from pancreatic cancer patients (PanCA) and normal healthy controls (Controls)

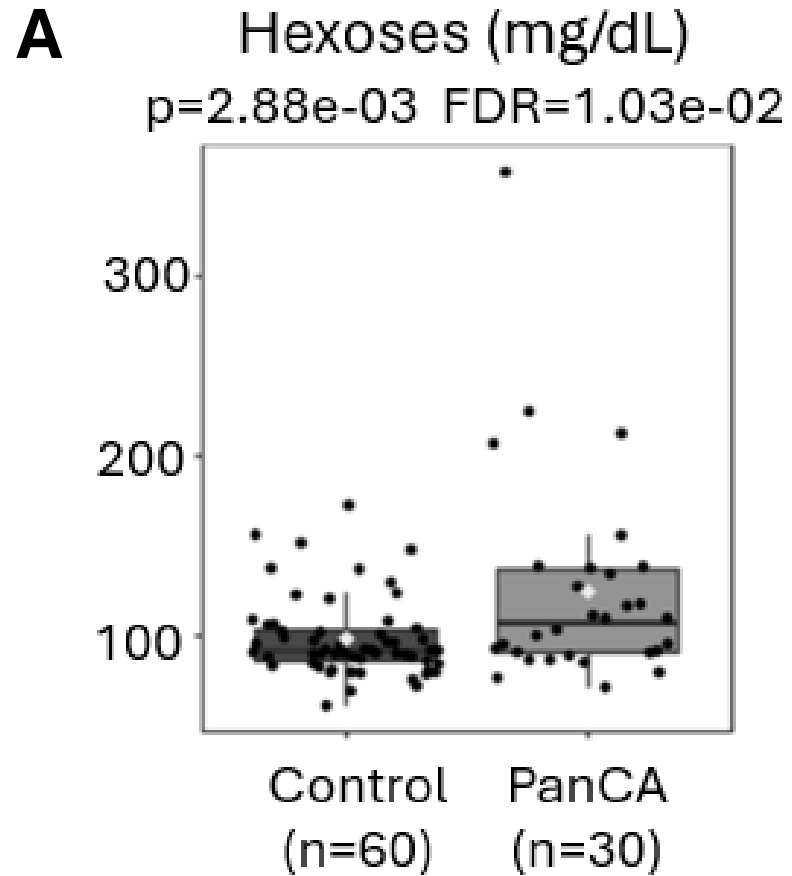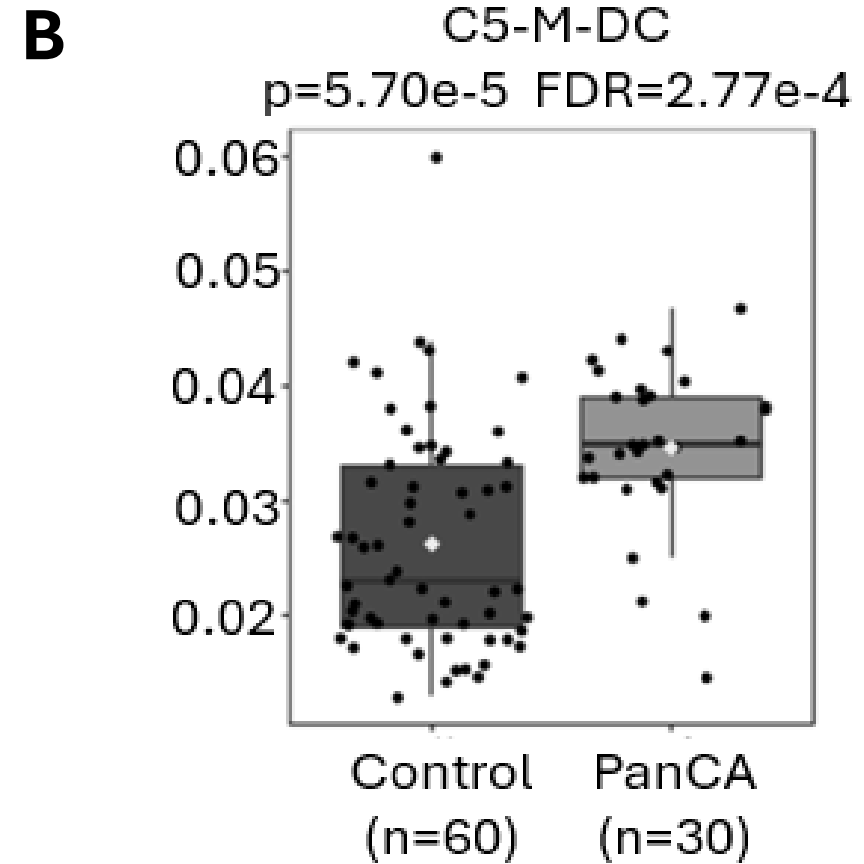

**Supplemental Figure 3 (A and B):** A comparison of plasma Hexoses (A) and methyl-glutaryl-carnitine (C5-M-DC) (B) concentrations from pancreatic cancer patients (PanCA) and normal healthy controls (Controls)

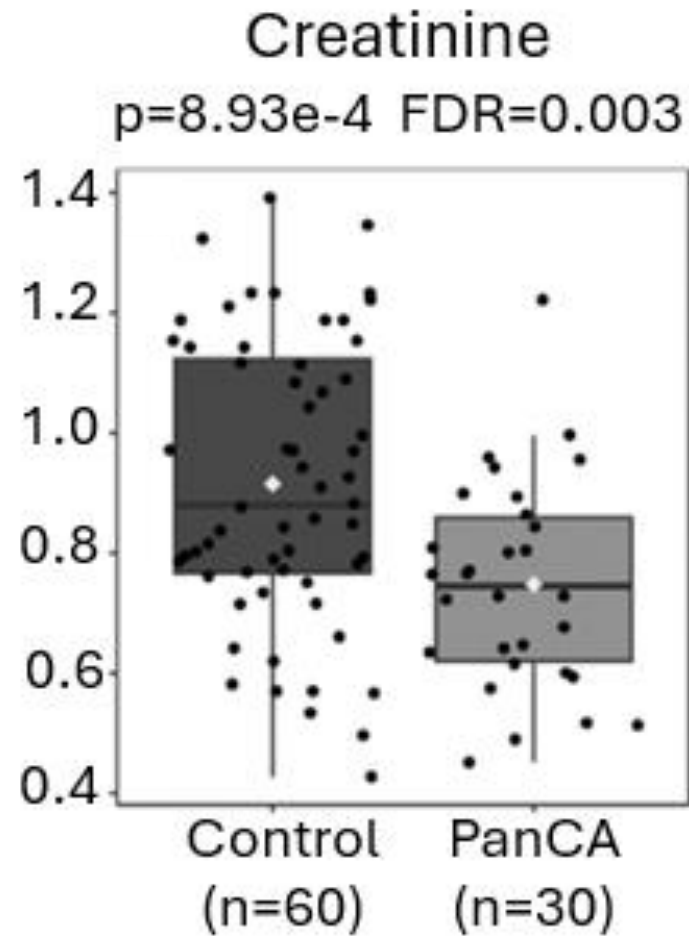

**Supplemental Figure S4** – A comparison of plasma creatinine concentrations from pancreatic cancer patients (PanCA) and normal healthy controls (Controls).

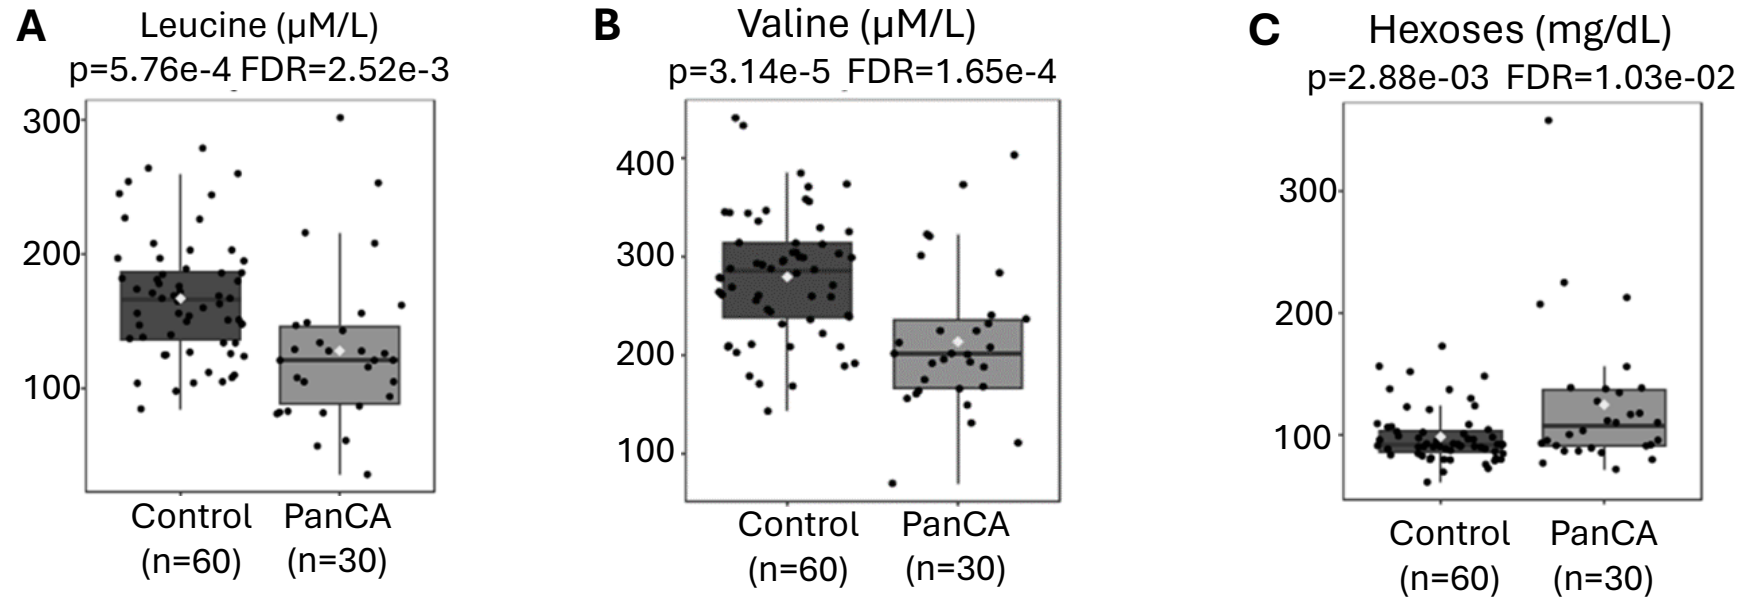

**Supplemental Figure S5 (A, B and C)** – A comparison of plasma BCAA (Valine (A) and Leucine (B) concentrations with hexose levels ( C) from pancreatic cancer patients (PanCA) and normal healthy controls (Controls).

**A**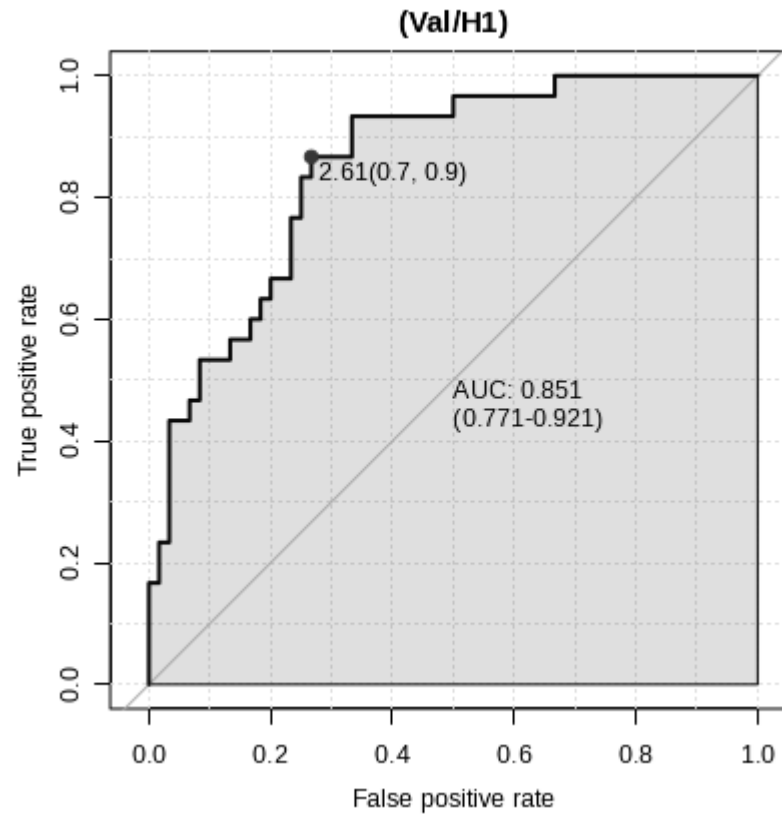**B**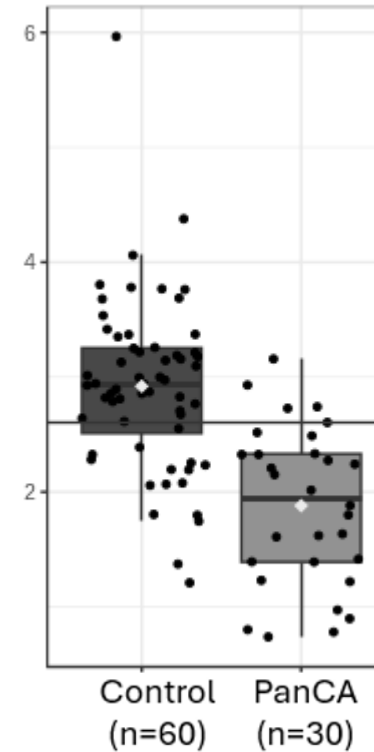

**Supplemental Figure S6** – Receiver Operator Curve (ROC) depicting the ratio of Valine (Val) to Hexose (H1) in plasma from patients with pancreatic cancer (PanCA) and normal healthy controls (Controls).

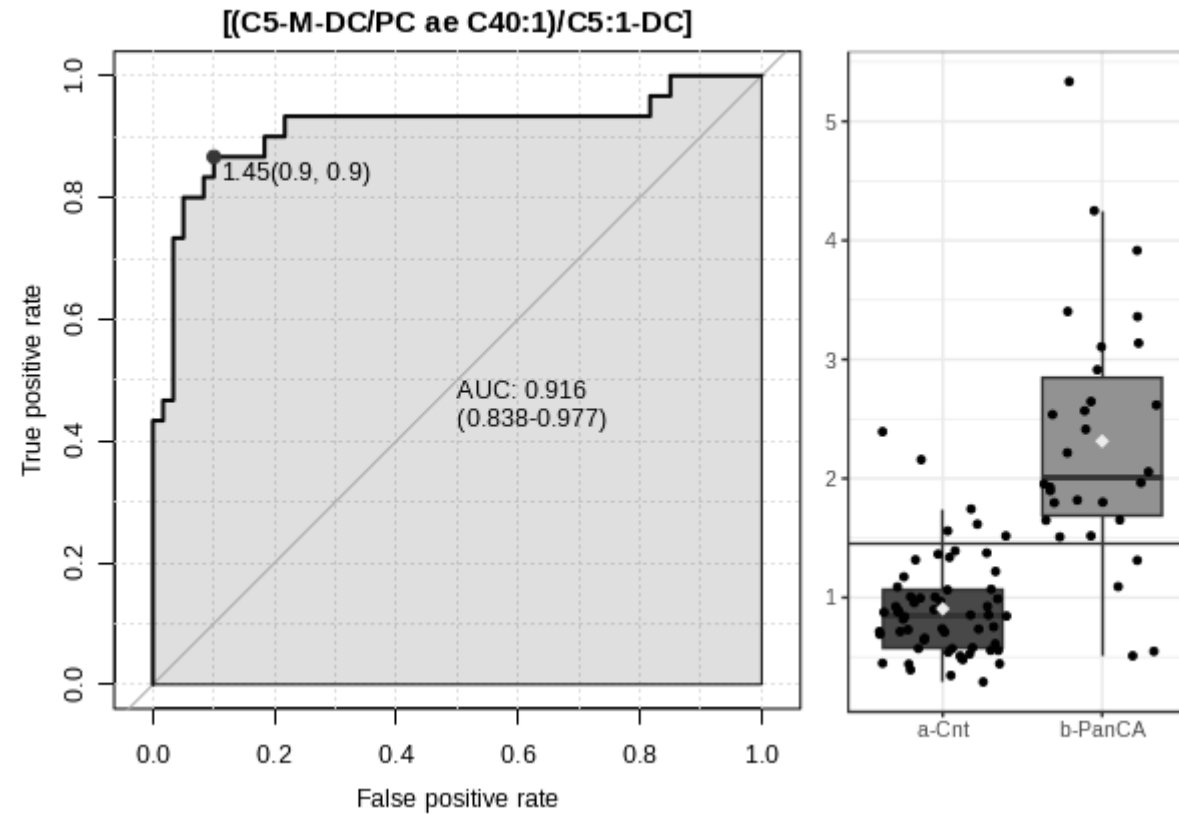

**Supplemental Figure S7** – Receiver Operator Curve (ROC) depicting the ratio of (C5-M-DC/PC ae C40:1) to C5:1-DC in plasma from patients with pancreatic cancer (PanCA) and normal healthy controls (Controls).

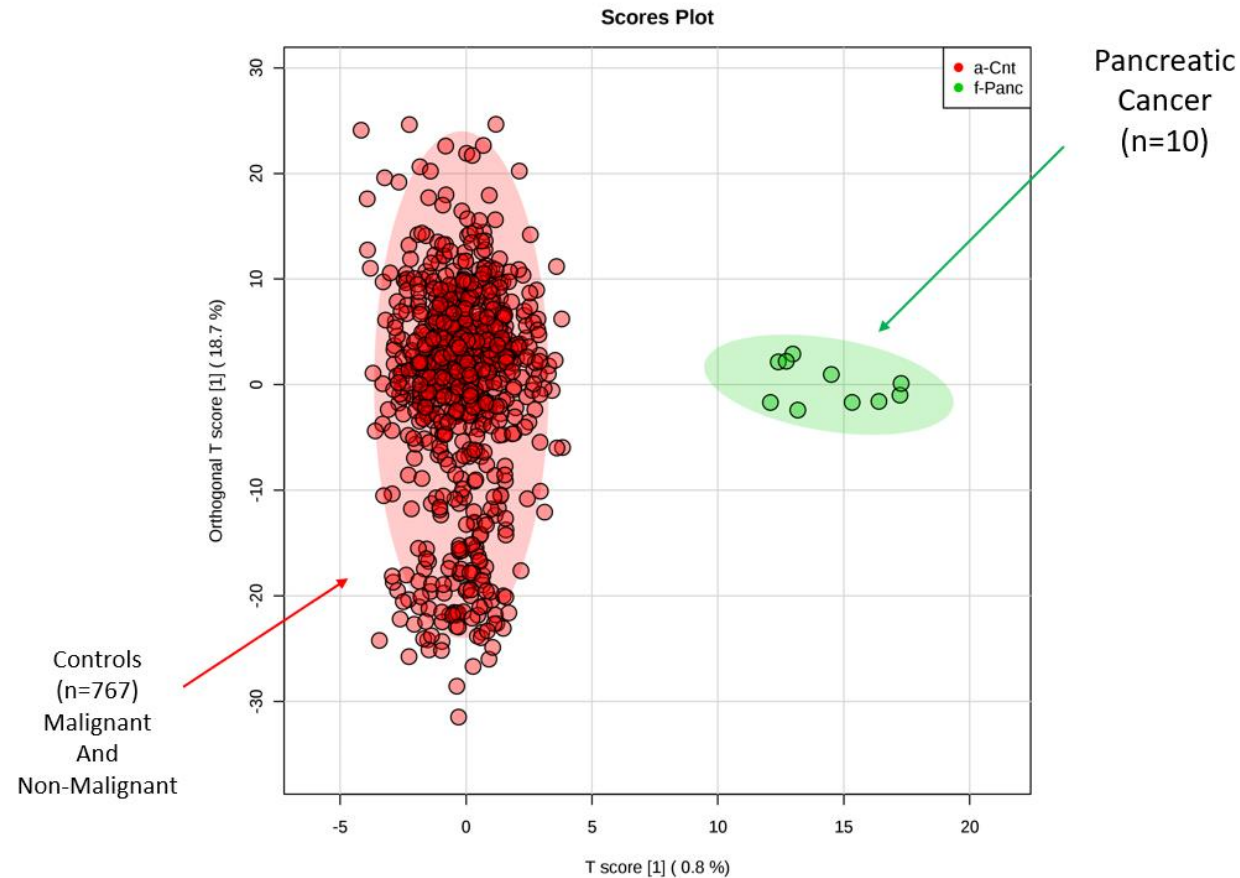

**Supplemental Figure S8** – PCA unsupervised analysis where pancreatic cancer (PDAC) samples were analyzed against other malignant conditions: liver cancer (30), lung cancer (23), colon cancer (85), head/neck cancer (58), hematologic cancer (65), breast cancer (58); and against samples from patients with non-malignant metabolic and immunological chronic conditions: late stages of metabolic syn-drome (70), HCV-induced cirrhosis (30); hyperthyroidism (8); hypothyroidism (8); HIV infection (18); polycystic ovary syndrome (49); auto immune disease (86) and with control samples from healthy individuals (169).



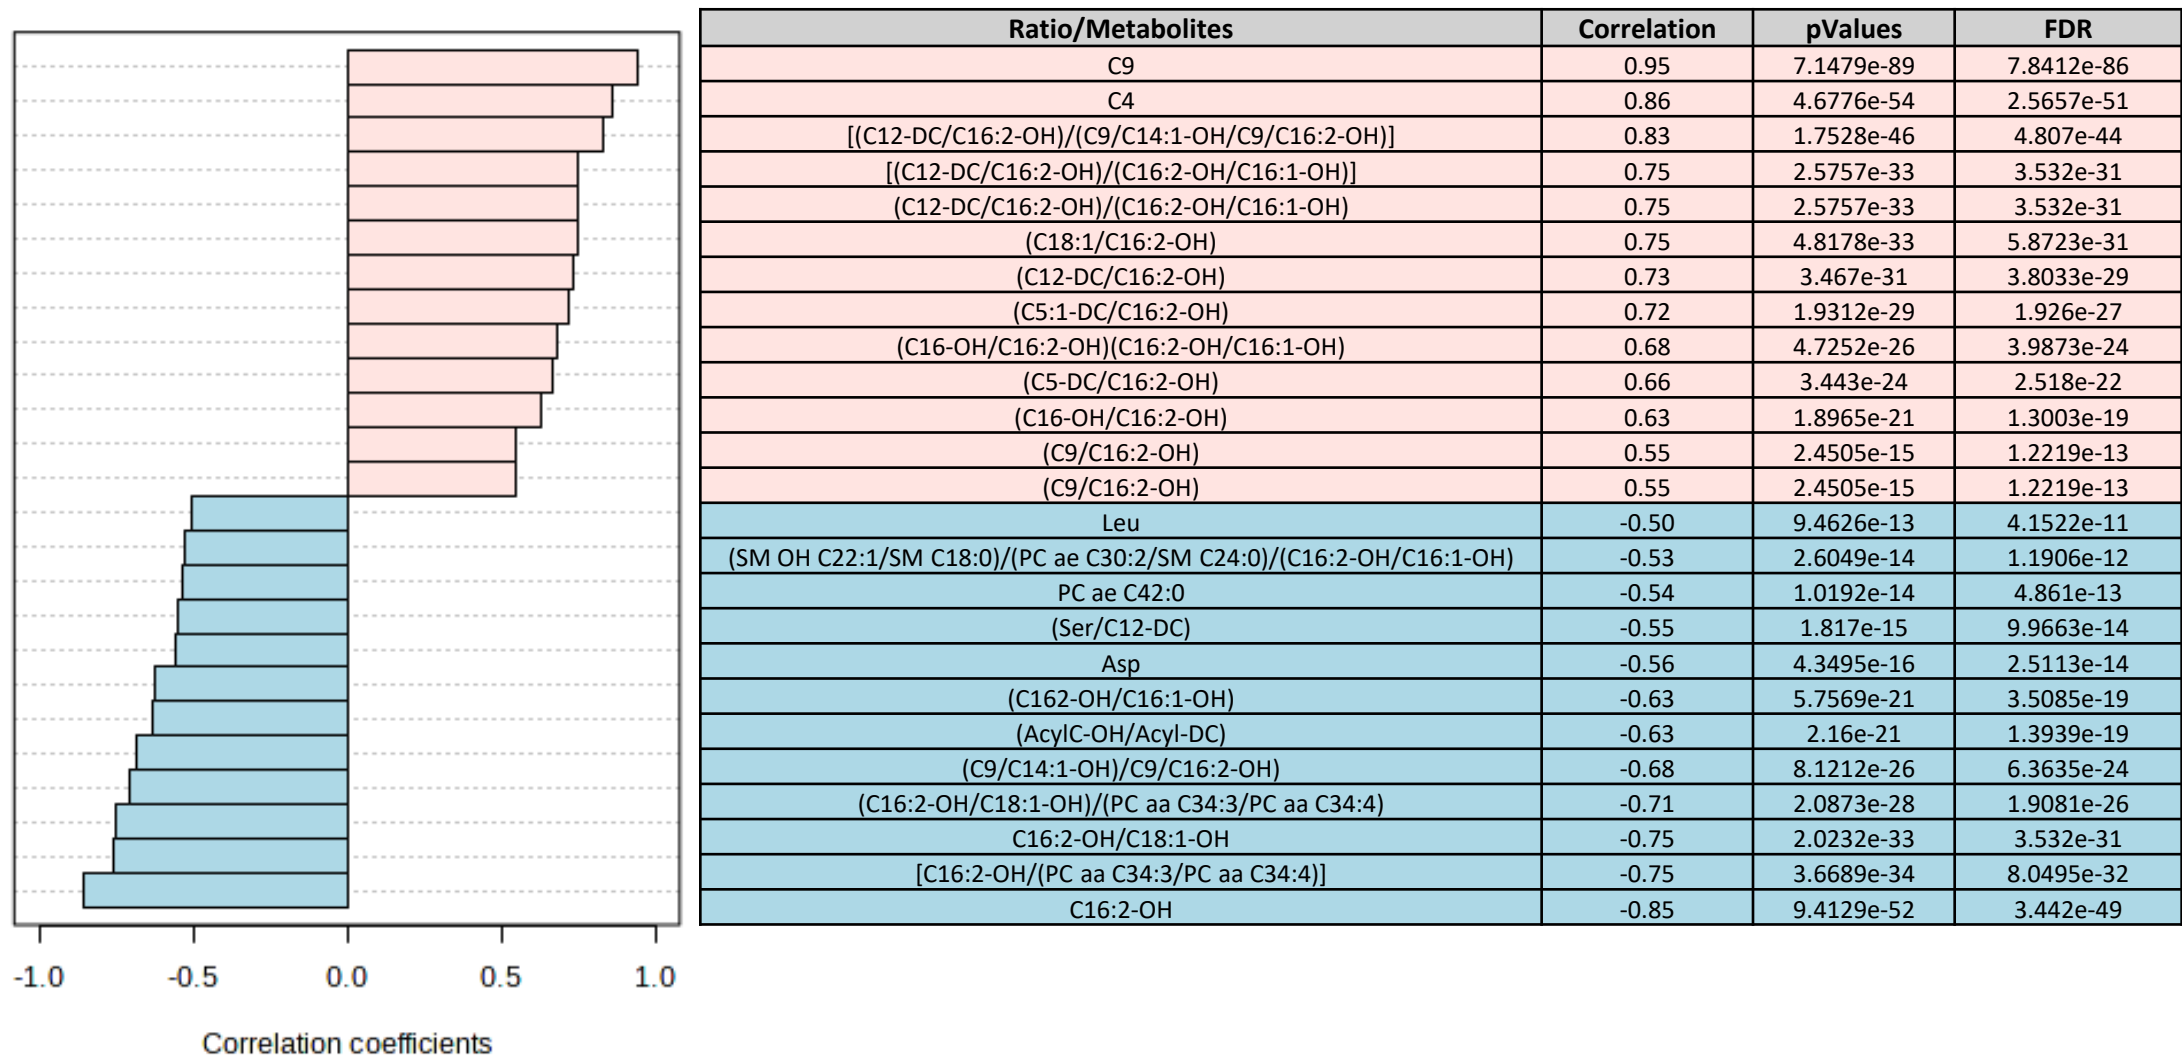

**Supplemental Figure S9** – Pearson Moment (R-values) metabolite and ratios correlations with PDAC diagnosis.
