# Supplementary material for: Diagnostic and Prognostic Performance of Metabolic Signatures in Pancreatic Ductal Adenocarcinoma: The Clinical Application of Quantitative NextGen Mass Spectrometry
Source: Metabolites. 2024 Feb 29;14(3):148. doi: 10.3390/metabo14030148 (PMC10972340; doi:10.3390/metabo14030148)
Supplement: Supplementary file 1 [file metabolites-14-00148-s001.zip]

Archive with 4 entries (4 files):
- Supplemental Figures.pdf
- Supplemental Table S1.xlsx
- Supplemental Table S2.xlsx
- Supplemental Table S3.pdf
