# Supplementary material for: Diagnostic and Prognostic Performance of Metabolic Signatures in Pancreatic Ductal Adenocarcinoma: The Clinical Application of Quantitative NextGen Mass Spectrometry
Source: Metabolites. 2024 Feb 29;14(3):148. doi: 10.3390/metabo14030148 (PMC10972340; doi:10.3390/metabo14030148)
Supplement: Supplementary file 1 [file metabolites-14-00148-s001.zip › Supplemental Table S1.xlsx]

## Sheet: PDAC patients
Table S1 - Clinical characteristics of PDAC patients.
Samples	DOB	Gender	Age at the time of evaluation	Clinical Stage	Diabetes	Genomics	Data Source / Methodology	Genomic Aberrancies
1	1965-04-17	M	54	IV	no	no	Guardant	No mutations detected
2	1952-04-19	M	67	IV	no	yes	OmniSeq	CDKN2A, SMAD4 loss
3	1960-09-09	M	58	IV	no	yes	Caris	CDKN2A 117fs, KDM6A, TP53, KRAS G12D
4	1945-05-21	M	77	IV	no	yes	Guardant	KRAS G12R, TP53 R248Q
5	1971-12-07	M	46	IV	no	no	N/A
6	1954-10-30	M	64	IV	yes	no	N/A
7	1977-01-27	M	41	IV	no	yes	Myriad	RAD51D
8	1956-10-06	F	62	III	yes	no	N/A
9	1943-11-11	M	75	III	no	no	N/A
10	1963-06-10	F	55	IV	no	no	N/A
11	1950-08-19	F	68	IA	yes	no	N/A
12	1975-08-21	F	43	IV	no	no	N/A
13	1938-07-05	M	81	IV	yes	no	N/A
14	1934-09-10	F	84	IIB	no	yes	Color	No mutations detected
15	1952-11-07	F	66	IV	no	yes	Guardant	KRAS G12R, TP53 G245S
16	1959-05-10	M	59	IV	no	no	N/A
17	1937-06-23	F	81	IV	no	no	N/A
18	1942-04-16	F	77	IV	no	no	N/A
19	1951-12-19	F	67	III	no	no	N/A
20	1942-07-07	M	75	IV	no	no	N/A
21	1934-06-20	F	85	III	no	no	N/A
22	1950-02-17	M	66	IIB	no	no	N/A
23	1963-05-30	F	57	IV	no	yes	Guardant	KRAS G12D, APC E1540, CDKN2A, CHEK2
24	1957-01-10	M	65	IIA	yes	yes	Foundation One	AKT3 amp, ATM, CDKN2A, GATN6 amp, HGF amp
25	1938-03-31	F	83	IV	no	yes	Foundation One	KRAS G12V, MTAP, CDKN2A/B, KDM6A, SMAD4, TP53
26	1971-08-15	M	50	IV	no	no	N/A
27	1951-08-11	F	70	IV	yes	yes	Tempus	BRAF, GNAS
28	1950-09-01	M	59	IV	no	no	N/A
29	1961-09-15	F	60	IIB	no	no	N/A
30	1974-12-04	F	47	IV	no	no	N/A
Legend: Amp = gene amplification; Loss = loss of function mutation, N/A = not available.
