# Supplementary material for: Diagnostic and Prognostic Performance of Metabolic Signatures in Pancreatic Ductal Adenocarcinoma: The Clinical Application of Quantitative NextGen Mass Spectrometry
Source: Metabolites. 2024 Feb 29;14(3):148. doi: 10.3390/metabo14030148 (PMC10972340; doi:10.3390/metabo14030148)
Supplement: Supplementary file 1 [file metabolites-14-00148-s001.zip › Supplemental Table S2.xlsx]

## Sheet: Controls
Table S2 - Clinical characteristics of controls.
Sample	Gender	Age at the time of evaluation	Diabetes Diagnosis	Other Comorbidities
1	F	70	no	autoimmune disease
2	M	92	no	none
3	M	66	no	none
4	F	70	no	none
5	M	70	yes	none
6	M	62	no	hypertension
7	M	73	no	none
8	F	63	no	none
9	F	60	no	none
10	F	60	no	none
11	F	68	no	none
12	M	76	no	none
13	M	73	no	hypertension
14	M	64	yes	coronary arterial disease
15	M	69	no	cerebrovascular disease
16	M	62	no	none
17	M	70	no	hypertension
18	F	67	no	none
19	F	69	no	none
20	M	63	no	none
21	F	70	no	autoimmune disease
22	M	65	yes	coronary arterial disease
23	F	62	no	hypertension
24	M	62	no	none
25	F	91	no	myelodysplasia
26	M	68	no	none
27	F	73	no	none
28	F	65	no	none
29	M	63	no	none
30	F	69	no	none
31	M	67	no	none
32	F	63	yes	none
33	F	60	yes	hypothyroidism, hypertension
34	F	65	no	none
35	M	67	no	none
36	M	77	no	none
37	F	66	no	none
38	F	64	no	none
39	F	62	no	none
40	F	62	no	none
41	F	57	no	none
42	M	61	no	ulcerative colitis
43	F	60	no	none
44	F	83	no	hypertension, cardiovasculary disease
45	M	65	no	hypertension, coronary arterial disease
46	M	64	no	none
47	F	62	no	hypothyroidism
48	F	71	yes	hypothyroidism
49	F	87	no	none
50	M	69	no	none
51	M	74	no	none
52	M	65	no	none
53	F	73	no	hypothyroidism
54	M	60	no	autoimmune
55	F	80	no	none
56	F	64	no	hypertension, raynaud syndrome
57	F	61	no	none
58	F	75	no	none
59	F	66	no	hypertension
60	M	69	no	none
